# Supplementary material for: A systematic review of climate change science relevant to Australian design flood estimation
Source: Copernicus journal article supplement (doi:10.5194/hess-28-1251-2024), 2024-03-15
Supplement: Supplementary file 1 [file hess-28-1251-2024-supplement.zip]

Archive with 3 entries (3 files):
- supplementary_information.docx
- supplementary_table.xlsx
- hess-28-1251-2024-supplement-title-page.pdf
