# Supplementary material for: A systematic review of climate change science relevant to Australian design flood estimation
Source: Copernicus journal article supplement (doi:10.5194/hess-28-1251-2024), 2024-03-15
Supplement: Supplementary file 1 [file hess-28-1251-2024-supplement.zip › hess-28-1251-2024-supplement-title-page.pdf]

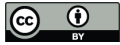

## *Supplement of*

# **A systematic review of climate change science relevant to Australian design flood estimation**

**Conrad Wasko et al.**

*Correspondence to:* Conrad Wasko ([conrad.wasko@unimelb.edu.au](mailto:conrad.wasko@unimelb.edu.au))

- [hess-28-1251-2024-supplement-title-page.pdf](#)
- [supplementary\\_information.docx](#)
- [supplementary\\_table.xlsx](#)

The copyright of individual parts of the supplement might differ from the article licence.
