# Supplementary material for: A systematic review of climate change science relevant to Australian design flood estimation
Source: Copernicus journal article supplement (doi:10.5194/hess-28-1251-2024), 2024-03-15
Supplement: Supplementary file 1 [file hess-28-1251-2024-supplement.zip › supplementary_information.docx]

**Table S1.** Systematic review search terms.

| Search Terms | Number of Articles |
| --- | --- |
| Flood frequency analysis | |
| TITLE-ABS-KEY (Australia AND “flood frequency” AND change) | 76 |
| Continuous simulation | |
| TITLE-ABS-KEY (Australia AND downscaling AND flood AND change) | 10 |
| TITLE-ABS-KEY (Australia AND “flood frequency” AND projection) | 6 |
| TITLE-ABS-KEY (Australia AND “bottom up” AND flood) | 8 |
| TITLE-ABS-KEY (Australia AND “scenario neutral” AND flood) | 0 |
| TITLE-ABS-KEY (Australia AND “decision scaling” AND flood) | 0 |
| TITLE-ABS-KEY (Australia AND downscaling AND flood AND change) | 10 |
| TITLE-ABS-KEY (Australia AND “flood frequency” AND projection) | 6 |
| TITLE-ABS-KEY (Australia AND “bottom up” AND flood) | 8 |
| Rainfall intensity |  |
| TITLE-ABS-KEY (Australia AND “heavy rainfall” AND change) | 79 |
| TITLE-ABS-KEY (Australia AND “heavy rainfall” AND projection) | 9 |
| TITLE-ABS-KEY (Australia AND “heavy rainfall” AND trend) | 32 |
| TITLE-ABS-KEY (Australia AND “extreme rainfall” AND change) | 144 |
| TITLE-ABS-KEY (Australia AND “extreme rainfall” AND projection) | 34 |
| TITLE-ABS-KEY (Australia AND “extreme rainfall” AND trend) | 54 |
| TITLE-ABS-KEY (Australia AND “extreme precipitation” AND change) | 64 |
| TITLE-ABS-KEY (Australia AND “extreme precipitation” AND projection) | 10 |
| TITLE-ABS-KEY (Australia AND “extreme precipitation” AND trend) | 12 |
| TITLE-ABS-KEY (Australia AND “heavy precipitation” AND change) | 22 |
| TITLE-ABS-KEY (Australia AND “heavy precipitation” AND projection) | 7 |
| TITLE-ABS-KEY (Australia AND “heavy precipitation” AND trend) | 29 |
| TITLE-ABS-KEY (Australia AND “Clausius-Clapeyron”) | 20 |
| Probable maximum precipitation |  |
| TITLE-ABS-KEY (Australia AND “probable maximum precipitation” AND change) | 7 |
| Temporal and spatial patterns |  |
| TITLE-ABS-KEY (Australia AND “temporal pattern” AND change AND “rainfall”) | 25 |
| TITLE-ABS-KEY (Australia AND “temporal pattern” AND change AND “design storm”) | 2 |
| TITLE-ABS-KEY (Australia AND “design burst” AND change) | 0 |
| TITLE-ABS-KEY (Australia AND “design rainfall” AND “temporal pattern” AND change) | 2 |
| TITLE-ABS-KEY (Australia AND “areal reduction factor” AND “change” AND rainfall) | 3 |
| TITLE-ABS-KEY (Australia AND spatial AND change AND “design rainfall”) | 6 |
| TITLE-ABS-KEY (Australia AND spatial AND change AND “design rainfall”) | 0 |
| TITLE-ABS-KEY (Australia AND spatial AND “design burst”) | 0 |
| TITLE-ABS-KEY (Australia AND “correlation structure” AND rainfall AND change) | 2 |
| TITLE-ABS-KEY (Australia AND “spatial dependency” AND rainfall AND change) | 2 |
| TITLE-ABS-KEY (Australia AND “rainfall intensification” AND spatial) | 0 |
| TITLE-ABS-KEY (Australia AND “rainfall intensification” AND temporal) | 0 |
| TITLE-ABS-KEY (Australia AND “extreme rainfall” AND spatial AND change) | 33 |
| Antecedent wetness |  |
| TITLE-ABS-KEY (Australia AND flood AND “antecedent conditions”) | 16 |
| TITLE-ABS-KEY (Australia AND flood AND “continuing loss”) | 12 |
| TITLE-ABS-KEY (Australia AND flood AND “infiltration loss”) | 3 |
| TITLE-ABS-KEY (Australia AND flood AND “proportional loss”) | 3 |
| TITLE-ABS-KEY (Australia AND flood AND “initial loss”) | 18 |

**Table S2.** Final set of articles included in systematic review.

| Authors | Year | Title | Journal | Volume | Pages/Article Number |
| --- | --- | --- | --- | --- | --- |
| Alexander, L.V., Arblaster, J.M. | 2017 | Historical and projected trends in temperature and precipitation extremes in Australia in observations and CMIP5 | Weather and Climate Extremes | 15 | 34-56 |
| Ali, H., Fowler, H.J., Lenderink, G., Lewis, E., Pritchard, D. | 2021 | Consistent Large-Scale Response of Hourly Extreme Precipitation to Temperature Variation Over Land | Geophysical Research Letters | 48 | e2020GL090317 |
| Ayat, H., Evans J.P., Sherwood, S.C., Soderholm, J. | 2022 | Intensification of subhourly heavy rainfall | Science | 378 | 655-659 |
| Bao, J., Sherwood, S.C., Alexander, L.V., Evans, J.P. | 2017 | Future increases in extreme precipitation exceed observed scaling rates | Nature Climate Change | 7 | 128-132 |
| Barbero, R., Westra, S., Lenderink, G., Fowler, H.J. | 2018 | Temperature-extreme precipitation scaling: a two-way causality? | International Journal of Climatology | 38 | e1274-e1279 |
| BoM and CSIRO | 2015 | Climate Change in Australia | <https://www.climatechangeinaustralia.gov.au/en/communication-resources/reports/> | - | - |
| Bureau of Meteorology | 2022 | Assessment Reports | https://awo.bom.gov.au/about/overview/assessment-reports#regionsandreports | - | - |
| Bruyère, C.L., Done, J.M., Jaye A.B., Holland, G.J., Buckley, B., Henderson, D.J., Leplastrier, M., Chan, P. | 2019 | Physically-based landfalling tropical cyclone scenarios in support of risk assessment | Weather and Climate Extremes | 26 | 100229 |
| Bui, A., Johnson, F., Wasko, C. | 2019 | The relationship of atmospheric air temperature and dew point temperature to extreme rainfall | Environmental Research Letters | 14 | 74025 |
| Chen, H., Sun, J., Chen, X. | 2014 | Projection and uncertainty analysis of global precipitation-related extremes using CMIP5 models | International Journal of Climatology | 34 | 2730-2748 |
| Chen, Y.-R., Yu, B., Jenkins, G. | 2013 | Secular variation in rainfall and intensity-frequency duration curves in Eastern Australia | Journal of Water and Climate Change | 4 | 244-251 |
| Chevuturi, A., Klingaman, N.P., Turner, A.G., Hannah, S. | 2018 | Projected Changes in the Asian-Australian Monsoon Region in 1.5°C and 2.0°C Global-Warming Scenarios | Earth's Future | 6 | 339-358 |
| Contractor, S., Donat, M.G., Alexander, L.V. | 2018 | Intensification of the Daily Wet Day Rainfall Distribution Across Australia | Geophysical Research Letters | 45 | 8568-8576 |
| Coppola, E., et al. | 2021 | Climate hazard indices projections based on CORDEX-CORE, CMIP5 and CMIP6 ensemble | Climate Dynamics | 57 | 1293-1383 |
| Dey, R., Gallant, A.J.E., Lewis, S.C. | 2020 | Evidence of a continent-wide shift of episodic rainfall in Australia | Weather and Climate Extremes | 29 | 100274 |
| Dey, R., Lewis S.C., Arblaster, J.M., Abram, N.J. | 2019 | A review of past and projected changes in Australia's rainfall | Wiley Interdisciplinary Reviews: Climate Change | 10 | e577 |
| Du, H., et al. | 2019 | Precipitation From Persistent Extremes is Increasing in Most Regions and Globally | Geophysical Research Letters | 46 | 6041-6049 |
| Evans, J.P., McCabe, M.F. | 2013 | Effect of model resolution on a regional climate model simulation over southeast Australia | Climate Research | 56 | 131-145 |
| Fu, G., Chiew, F.H.S., Post, D.A. | 2023 | Trends and variability of rainfall characteristics influencing annual streamflow: A case study of southeast Australia | International Journal of Climatology | 43 | 1407-1430 |
| Gu, X., Zhang, Q., Li, J., Liu, J., Xu, C.-Y., Sun, P. | 2020 | The changing nature and projection of floods across Australia | Journal of Hydrology | 584 | 124703 |
| Guerreiro, S.B., Fowler, H.J., Barbero, R., Westra, S., Lenderink, G., Blenkinsop, S., Lewis, E., Li, X.-F. | 2018 | Detection of continental-scale intensification of hourly rainfall extremes | Nature Climate Change | 8 | 803-807 |
| Gutierrez, J.M., et al. | 2021 | IPCC AR6 WG1 interactive atlas | http://interactive-atlas.ipcc.ch/ | - | - |
| Hajani, E., Rahman, A. | 2018 | Characterizing changes in rainfall: A case study for New South Wales, Australia | International Journal of Climatology | 38 | 1452-1462 |
| Han, X., Mehrotra R., Sharma A., Rahman A. | 2022 | Incorporating nonstationarity in regional flood frequency analysis procedures to account for climate change impact | Journal of Hydrology | 612 | 128235 |
| Han, X., Mehrotra, R., Sharma, A. | 2020 | Measuring the spatial connectivity of extreme rainfall | Journal of Hydrology | 590 | 125510 |
| Herath, S.M., Sarukkalige, P.R., Nguyen, V.T.V. | 2016 | A spatial temporal downscaling approach to development of IDF relations for Perth airport region in the context of climate change | Hydrological Sciences Journal | 61 | 2061-2070 |
| Herold, N., Downes, S.M., Gross, M.H., Nishant, R., Macadam, I., Ridder, N.N., Beyer, K. | 2021 | Projected changes in the frequency of climate extremes over southeast Australia | Environmental Research Communcations | 3 | 11001 |
| Ho, M., Nathan, R., Wasko, C., Vogel, E., Sharma, A. | 2022 | Projecting changes in flood event runoff coefficients under climate change | Journal of Hydrology | 615 | 128689 |
| Ho, M., Wasko, C., O’Shea, D., Nathan, R., Vogel, E., Sharma, A. | 2023 | Changes in flood-associated rainfall losses under climate change | Journal of Hydrology | 625 | 129950 |
| Jayaweera, L., Wasko, C., Nathan, R., Johnson, F. | 2023 | Non-stationarity in extreme rainfalls across Australia | Journal of Hydrology | 624 | 129872 |
| Ju, J., Wu C., Yeh, P.J.-F., Da,i H., Hu, B.X. | 2021 | Global precipitation-related extremes at 1.5 °C and 2 °C of global warming targets: Projection and uncertainty assessment based on the CESM-LWR experiment | Atmospheric Research | 264 | 105868 |
| Kamruzzaman, M., Beecham, S., Metcalfe, A.V. | 2016 | Estimation of trends in rainfall extremes with mixed effects models | Atmospheric Research | 168 | 24-32 |
| Laz, O.U., Rahman, A., Yilmaz, A., Haddad, K. | 2014 | Trends in sub-hourly, sub-daily and daily extreme rainfall events in eastern Australia | Journal of Water and Climate Change | 5 | 667-675 |
| Li, J., Wasko, C., Johnson, F., Evans, J.P., Sharma, A. | 2018 | Can Regional Climate Modeling Capture the Observed Changes in Spatial Organization of Extreme Storms at Higher Temperatures? | Geophysical Research Letters | 45 | 4475-4484 |
| Liu, J., Qiao, S., Li, C., Tang, S., Chen, D., Feng, G. | 2021 | Anthropogenic influence on the intensity of extreme precipitation in the Asian-Australian monsoon region in HadGEM3-A-N216 | Atmospheric Science Letters | 22 | e1036 |
| Liu, J., Wu, D., Li, Y., Ren, H., Zhao, Y., Sun, X., Zhang, H., Ji M. | 2022 | Spatiotemporal variation of precipitation on a global scale from 1960 to 2016 in a new normalized daily precipitation dataset | International Journal of Climatology | 42 | 3648-3665 |
| Magan, B., Kim, S., Wasko, C., Barbero, R., Moron, V., Nathan, R., Sharma, A. | 2020 | Impact of atmospheric circulation on the rainfall-temperature relationship in Australia | Environmental Research Letters | 15 | 94098 |
| Mantegna, G.A., White, C.J., Remenyi, T.A., Corney, S.P., Fox-Hughes, P. | 2017 | Simulating sub-daily Intensity-Frequency-Duration curves in Australia using a dynamical high-resolution regional climate model | Journal of Hydrology | 554 | 277-291 |
| Osburn, L., Hope, P., Dowdy, A. | 2021 | Changes in hourly extreme precipitation in victoria, Australia, from the observational record | Weather and Climate Extremes | 31 | 100294 |
| Pepler, A.S., Dowdy, A.J. | 2022 | Australia’s Future Extratropical Cyclones | Journal of Climate | 35 | 4195-4210 |
| Pfahl, S., O'Gorman, P.A., Fischer, E.M. | 2017 | Understanding the regional pattern of projected future changes in extreme precipitation | Nature Climate Change | 7 | 423-427 |
| Roderick, T.P., Wasko, C., Sharma, A. | 2020 | An Improved Covariate for Projecting Future Rainfall Extremes? | Water Resources Research | 56 | e2019WR026924 |
| Salas, J.D., Anderson, M.L., Papalexiou, S.M., Frances, F. | 2020 | PMP and Climate Variability and Change: A Review | Journal of Hydrologic Engineering | 25 | 03120002 |
| Shields, C.A., Kiehl, J.T., Meehl, G.A. | 2016 | Future changes in regional precipitation simulated by a half-degree coupled climate model: Sensitivity to horizontal resolution | Journal of Advances in Modeling Earth Systems | 8 | 863-884 |
| Sillmann, J., Kharin, V.V., Zwiers, F.W., Zhang, X., Bronaugh, D. | 2013 | Climate extremes indices in the CMIP5 multimodel ensemble: Part 2. Future climate projections | Journal of Geophysical Research Atmospheres | 118 | 2473-2493 |
| Smith, I., McAlpine, C. | 2014 | Estimating future changes in flood risk: Case study of the Brisbane river, Australia | Climate Risk Management | 6 | 6-17 |
| Tolhurst, G., Hope, P., Osburn, L., Rauniyar, S. | 2023 | Approaches to Understanding Decadal and Long-Term Shifts in Observed Precipitation Distributions in Victoria, Australia | Journal of Applied Meteorology and Climatology | 62 | 3-19 |
| Visser, J.B., Wasko, C., Sharma, A., Nathan, R. | 2021 | Eliminating the Hook in Precipitation Temperature Scaling | Journal of Climate | 34 | 9535-9549 |
| Visser, J.B., Kim, S., Wasko, C., Nathan, R., Sharma, A. | 2022 | The Impact of Climate Change on Operational Probable Maximum Precipitation Estimates | Water Resources Research | 58 | e2022WR032247 |
| Visser, J.B., Wasko, C., Sharma, A., Nathan, R. | 2023 | Changing storm temporal patterns with increasing temperatures across Australia | Journal of Climate | - | 10.1175/JCLI-D-22-0694.1 |
| Wasko, C., Guo, D., Ho, M., Nathan, R., Vogel, E. | 2023 | Diverging projections for flood and rainfall frequency curves | Journal of Hydrology | 620 | 129403 |
| Wasko, C., Lu, W.T., Mehrotra, R. | 2018 | Relationship of extreme precipitation, dry-bulb temperature, and dew point temperature across Australia | Environmental Research Letters | 13 | 74031 |
| Wasko, C., Nathan, R. | 2019 | Influence of changes in rainfall and soil moisture on trends in flooding | Journal of Hydrology | 575 | 432-441 |
| Wasko, C., Sharma, A. | 2017 | Continuous rainfall generation for a warmer climate using observed temperature sensitivities | Journal of Hydrology | 544 | 575-590 |
| Wasko, C., Sharma, A. | 2014 | Quantile regression for investigating scaling of extreme precipitation with temperature | Water Resources Research | 50 | 3608-3614 |
| Wasko, C., Sharma, A. | 2015 | Steeper temporal distribution of rain intensity at higher temperatures within Australian storms | Nature Geoscience | 8 | 527–529 |
| Wasko, C., Sharma, A. | 2015 | Changed Design Temporal Patterns with Higher Temperatures | 36th Hydrology and Water Resources Symposium: The Art and Science of Water. | Engineers Australia, Barton, ACT. | 1237–1244 |
| Wasko, C., Sharma, A., Westra, S. | 2016 | Reduced spatial extent of extreme storms at higher temperatures | Geophysical Research Letters | 43 | 4026–4032 |
| Watterson, I.G. | 2020 | Influence of Sea Surface Temperature on Simulated Future Change in Extreme Rainfall in the Asia-Pacific | Asia-Pacific Journal of Atmospheric Sciences | 56 | 349-366 |
| Westra, S., Evans, J.P., Mehrotra, R., Sharma, A. | 2013 | A conditional disaggregation algorithm for generating fine time-scale rainfall data in a warmer climate | Journal of Hydrology | 479 | 86-99 |
| White, C.J., McInnes, K.L., Cechet, R.P., Corney, S.P., Grose, M.R., Holz, G.K., Katzfey, J.J., Bindoff, N.L. | 2013 | On regional dynamical downscaling for the assessment and projection of temperature and precipitation extremes across Tasmania, Australia | Climate Dynamics | 41 | 3145-3165 |
| Yilmaz, A.G., Hossain, I., Perera, B.J.C. | 2014 | Effect of climate change and variability on extreme rainfall intensity-frequency-duration relationships: A case study of Melbourne | Hydrology and Earth System Sciences | 18 | 4065-4076 |
| Zhan, W., Buckley, S., Genova, P., Grobler, J., Redenbach, M., Eskola, K. | 2022 | Selecting and Processing High Resolution Climate Projections in Queensland Mine Water Planning and Hydrologic Assessment | Hydrology and Water Resources Symposium, HWRS 2022 | - | 518-533 |
| Zhang, W., Villarini, G., Wehner, M. | 2019 | Contrasting the responses of extreme precipitation to changes in surface air and dew point temperatures | Climatic Change | 154 | 257–271 |
| Zheng, F., Westra, S., Leonard, M. | 2015 | Opposing local precipitation extremes | Nature Climate Change | 5 | 389-390 |

**Table S3.** Co-author best estimates of central scaling rates, likely (66%) range, and methodology employed.

| Anonymous author identifier | 1 hr [%/K]  (likely range) | 24 hr [%/K]  (likely range) | Methodology used to derive scaling rates |
| --- | --- | --- | --- |
| 1 | 14  (1-27) | 7  (2-11) | Studies were weighted subjectively out of ten. Zero or near zero weights given to any study based on a case study or single gauge location, or studies used daily data when calculating precipitation-temperature scaling. Historical trend studies were generally weighted less than those based on precipitation-temperature scaling and climate modelling. Greater weights were given to studies that had greater regional coverage. The final scaling was the weighted mean scaling with weighted standard deviation for the likely range. |
| 2 | 17  (6-30) | 7  (3-15) | Studies were given weightings of 0, 1, 2 or 3, with lower weights for papers with small numbers of stations/limited study areas or based on old data. These weightings were used to calculate a weighted mean for four categories – GCM, RCM, Trend, and Scaling, with weighting corrected to account for the number of data points from each paper.  For the 24-hour analysis, the four study types were given similar weights – 0.3 for RCM and trend studies, and 0.2 for GCM and scaling studies, to find a final mean value. For the hourly analysis, the weights were adjusted to 0.4 for trend papers and 0.1 for GCM papers.  The upper bound was determined based on both the weighted mean of the upper bound given within these papers, as well as the weighted 90th percentile of the mean scaling, which were broadly similar. |
| 3 | 16  (7-25) | 6  (-1-13) | Studies with rarities more common than the annual maxima, those based on frequency rather than intensity, those without clear conclusions, and those that covered temporal subsets were removed. The remaining studies were then subjectively weighted with lower weights given to studies with less reliable data sources or those dealing with rarer events. The final scaling was the weighted mean scaling with weighted standard deviation for the likely range. |
| 4 | 15  (7-30) | 10  (5-20) | The review outputs were considered in relation to several lines of evidence based on observations, modelling and physical process understanding, for both hourly and daily duration extremes. Hourly extremes were considered to include convective processes, with this also the case to a lesser degree for daily extremes, as well as considering the model limitations in simulating convective rainfall extremes. Daily rainfall extremes (e.g., of the order 20-year ARI) also typically include convective processes in northern and eastern Australia, with this also the case to some degree for Australia in general, such as synoptic rain-bearing systems sometimes having embedded convective processes that enhance rainfall. The review outputs indicate that super Clausius-Clapeyron scaling rates with global average temperature are more likely than not for rainfall extremes that include convective processes. The review also found that some storm types might become less frequent in a warming world, but with potential for the more intense storms to not reduce in frequency or even increase in some cases, while noting considerable uncertainty around future changes in intensity of some storm types. Scaling values were calculated based on weighted averages for different lines of evidence, including considering variations over different regions and different ARIs. The final scaling values are mid-range estimates representing extremes on average from 1-year ARI to PMP through Australia. |
| 5 | 15  (7-30) | 6  (2-15) | Separate subjective weights were derived for each line of evidence (e.g. historical trends, ‘scaling studies’, GCM, RCM) based on the relative strength of that line of evidence (e.g. number of studies and the extent to which that line of evidence captured key processes relevant for scaling). Within each line of evidence, subjective weights were determined for individual studies based on the quality of the study, considering factors such as spatial representation across Australia, amount of data analysed (e.g. number of gauges, length of record and/or number of different GCMs used in ensemble), and the recurrence interval(s) considered. The sensitivity of results to reasonable variations in the subjective weights was also analysed. The final scaling was the weighted mean scaling, with uncertainty based on a subjective weighted assessment of the mean and uncertainty intervals provided in individual studies. |
| 6 | 15  (7-26) | 7  (2-13) | Studies with rarities more common than the annual maxima and/or without clear conclusions were removed. Studies that used more data and covered larger regions were given higher weights. Each class of study (trends, scaling, global and regional climate models) was assessed separately before being combined into a final estimate. The final scaling was the weighted mean scaling with weighted standard deviation for the likely range. |

**Figure S1.** Standardisation of initial loss parameter projections by global mean temperature change. Each boxplot represents the median change for each site in the Natural Resource Management Regions (CSIRO and Bureau of Meteorology, 2015), across the projections developed Australian Bureau of Meteorology (Srikanthan et al., 2022; Vogel et al., 2023; Wilson et al., 2022).

**Figure S2.** Standardisation of continuing loss parameter projections by global mean temperature change. Each boxplot represents the median change for each site in the Natural Resource Management Regions (CSIRO and Bureau of Meteorology, 2015), across the projections developed Australian Bureau of Meteorology (Srikanthan et al., 2022; Vogel et al., 2023; Wilson et al., 2022).
